# Supplementary material for: Association between lipid levels and all-cause and cause-specific mortality in critically ill patients
Source: PubMed Central journal article supplement (PMC10060260; doi:10.1038/s41598-023-32209-z), 2023-03-29

## Supplementary material

### Association between lipid levels and all-cause and cause-specific mortality in critically ill patients

Shan Li, MD; Wei Zhang; MD, Hongbin Liu\*, MD

<sup>1</sup>Department of Cardiology, The Second Medical Center, Chinese People Liberation Army General Hospital, Beijing, China, <sup>2</sup>National Clinical Research Center for Geriatric Disease, Beijing, China.

\*Corresponding author. Email: liuhbinpla@163.com

#### Legends

**eTable 1. Baseline Characteristics of individuals according to quintiles of HDL-C levels**

**eTable 2. Baseline Characteristics of individuals according to quintiles of total cholesterol levels**

**eTable 3. Baseline Characteristics of individuals according to quintiles of triglyceride levels**

**eTable 4. Unadjusted and adjusted odds ratios for all-cause mortality by quintiles of LDL-C, HDL-C, total cholesterol and triglyceride levels**

**eTable 5. Unadjusted and adjusted odds ratios for cardiovascular mortality by quintiles of LDL-C, HDL-C, total cholesterol and triglyceride levels**

**eTable 6. Unadjusted and adjusted odds ratios for non-cardiovascular mortality by the quintiles of LDL-C, HDL-C, total cholesterol and triglyceride levels**

**eTable 7. Univariable and multivariable analysis for all-cause mortality with lipid levels below or above the risk inflection point**

**eTable 8. Unadjusted and adjusted odds ratios for all-cause mortality by LDL-C level combined with HDL-C level**

**eTable 9. Unadjusted and adjusted odds ratios for all-cause mortality according to quintiles of LDL-C, HDL-C, total cholesterol and triglyceride levels by excluding death within the first 24 hours of ICU entry**

**eTable 10. Unadjusted and adjusted odds ratios for all-cause mortality according to quintiles of LDL-C, HDL-C, total cholesterol and triglyceride levels with complete-case analyse**

**eTable 11. Unadjusted and adjusted odds ratios for all-cause mortality according to quintiles of LDL-C, HDL-C, total cholesterol and triglyceride levels by using the first measurement of ICU admission**

**eFigure 1. Multivariable adjusted odds ratios for all-cause and cause-specific mortality by quintiles of LDL-C, HDL-C, total cholesterol and triglyceride levels in individuals with lipid-lowering therapy**

**eFigure 2. Probability of all cause and cause-specific mortality based on LDL-C, HDL-C, total cholesterol and triglyceride levels in individuals without lipid-lowering therapy**

**eFigure 3. Multivariable adjusted all-cause mortality risk for total cholesterol levels stratified by covariates**

**eFigure 4. Probability of all cause mortality based on LDL-C, HDL-C, total cholesterol and triglyceride levels by excluding death within the first 24 hours of ICU entry**

**eFigure 5. Probability of all cause mortality based on LDL-C, HDL-C, total cholesterol and triglyceride levels with complete-case analyse**

**eFigure 6. Probability of all cause mortality based on LDL-C, HDL-C, total cholesterol and triglyceride levels by using the first measurement of ICU admission**

**eFigure 7. Kaplan–Meier curve for cumulative incidence with all cause mortality by quintiles of lipid levels**

**eFigure 8. Kaplan–Meier curve for cumulative incidence with all cause mortality by LDL-C level combined with HDL-C level**

**eTable 1. Baseline Characteristics of individuals according to quintiles of HDL-C levels**

| Baseline HDL-C                        | 1st Quintile       | 2nd Quintile      | 3rd Quintile      | 4th Quintile      | 5th Quintile      |
|---------------------------------------|--------------------|-------------------|-------------------|-------------------|-------------------|
|                                       | ≤28mg/dL           | 29-36mg/dL        | 36-42mg/dL        | 43-52mg/dL        | ≥53mg/dL          |
| N(%)                                  | 5136 (18.8)        | 5410 (19.8)       | 5517 (20.2)       | 5590 (20.5)       | 5663 (20.7)       |
| Age, years                            | 62.7 ± 14.7        | 64.1 ± 14.2       | 65.4 ± 14.3       | 66.7 ± 14.6       | 68.0 ± 14.9       |
| Male, N(%)                            | 3526 (68.7)        | 3719 (68.7)       | 3447 (62.5)       | 2965 (53.0)       | 2170 (38.3)       |
| Caucasian, N(%)                       | 3896 (75.9)        | 4091 (75.6)       | 4127 (74.8)       | 4066 (72.7)       | 4124 (72.8)       |
| Body mass index, kg/m <sup>2</sup>    | 28.3 ± 10.3        | 28.5 ± 10.2       | 27.8 ± 9.9        | 27.0 ± 9.8        | 25.7 ± 9.1        |
| Heart rate, bpm                       | 101 ± 31           | 92 ± 31           | 91 ± 31           | 92 ± 31           | 94 ± 31           |
| Mean blood pressure, mmHg             | 86 ± 42            | 92 ± 41           | 94 ± 41           | 96 ± 42           | 98 ± 43           |
| APACHE score                          | 47(27-67)          | 41 (24-57)        | 41 (25-56)        | 41 (25-56)        | 42 (26-57)        |
| Glasgow Coma Score                    | 12 ± 5             | 12 ± 5            | 12 ± 5            | 12 ± 5            | 12 ± 5            |
| Lab measurement                       |                    |                   |                   |                   |                   |
| LDL-C, mg/dL                          | 69 ± 37            | 84 ± 38           | 89 ± 39           | 91 ± 40           | 89 ± 39           |
| HDL-C, mg/dL                          | 21 ± 6             | 32 ± 2            | 39 ± 2            | 47 ± 3            | 66 ± 13           |
| Total cholesterol, mg/dL              | 123 ± 48           | 146 ± 45          | 155 ± 46          | 160 ± 45          | 173 ± 44          |
| Triglyceride, mg/dL                   | 137(95-198)        | 127(91-185)       | 115(83-163)       | 99 (73-138)       | 81(60-112)        |
| White blood cell, *10 <sup>9</sup> /L | 10.5<br>(7.5-14.8) | 9.7<br>(7.1-12.9) | 9.5<br>(7.2-12.6) | 9.3<br>(6.9-12.4) | 9.0<br>(6.4-12.2) |
| Hemoglobin, g/dL                      | 10.8 ± 3.40        | 11.2 ± 3.8        | 11.4 ± 3.7        | 11.2 ± 3.8        | 11.0 ± 3.8        |
| Platelet, *10 <sup>9</sup> /L         | 185<br>(133-249)   | 192<br>(144-242)  | 194<br>(148-242)  | 194<br>(146-243)  | 196<br>(146-245)  |
| Albumin, g/L                          | 27.5 ± 6.7         | 30.8 ± 6.0        | 31.5 ± 5.7        | 31.8 ± 5.8        | 32.1 ± 5.7        |
| Primary disease of admission          |                    |                   |                   |                   |                   |
| Circulatory disease, N(%)             | 2673 (52.0)        | 3688 (68.2)       | 4012 (72.7)       | 3927 (70.3)       | 3842 (67.8)       |
| Respiratory disease, N(%)             | 586 (11.4)         | 349 (6.5)         | 307 (5.6)         | 355 (6.4)         | 432 (7.6)         |
| Digestive disease, N(%)               | 410 (8.0)          | 230 (4.3)         | 134 (2.4%)        | 120 (2.1)         | 119 (2.1)         |
| Neurological disease, N(%)            | 177 (3.4)          | 193 (3.6)         | 193 (3.5)         | 266 (4.8)         | 304 (5.4)         |
| Genitourinary disease, N(%)           | 281 (5.5)          | 109 (2.0)         | 96 (1.7)          | 98 (1.8)          | 69 (1.2)          |
| Endocrine disease, N(%)               | 129 (2.5)          | 105 (1.9)         | 107 (1.9)         | 113 (2.0)         | 125 (2.2)         |
| Pre-admission comorbidities           |                    |                   |                   |                   |                   |
| ASCVD, N(%)                           | 1621 (31.6)        | 1859 (34.4)       | 1821 (33.0)       | 1711 (30.6)       | 1549 (27.4)       |
| Diabetes, N(%)                        | 1401 (27.3)        | 1446 (26.7)       | 1302 (23.6)       | 1121 (20.1)       | 970 (17.1)        |
| Hypertension, N(%)                    | 2685 (52.3)        | 2965 (54.8)       | 2988 (54.2)       | 3003 (53.7)       | 2994 (52.9)       |
| Heart failure, N(%)                   | 776 (15.1)         | 732 (13.5)        | 650 (11.8)        | 640 (11.4)        | 674 (11.9)        |
| COPD, N(%)                            | 566 (11.0)         | 549 (10.1)        | 542 (9.8)         | 553 (9.9)         | 762 (13.5)        |
| Renal failure, N(%)                   | 608 (11.8)         | 557 (10.3)        | 513 (9.3)         | 481 (8.6)         | 460 (8.1)         |
| Medication                            |                    |                   |                   |                   |                   |
| Lipid-lowering drugs, N(%)            | 1618 (31.5)        | 2115 (39.1)       | 2147 (38.9)       | 2028 (36.3)       | 1807 (31.9)       |
| Antiplatelet drugs, N(%)              | 542 (10.6)         | 578 (10.7)        | 605 (11.0)        | 497 (8.9)         | 512 (9.0)         |
| Anticoagulants, N(%)                  | 161 (3.1)          | 126 (2.3)         | 148 (2.7)         | 135 (2.4)         | 122 (2.2)         |
| Mechanical ventilation, N(%)          | 1148 (22.4)        | 945 (17.5)        | 902 (16.3)        | 895 (16.0)        | 928 (16.4)        |
| Dialysis, N(%)                        | 162 (3.2)          | 139 (2.6)         | 118 (2.1)         | 121 (2.2)         | 131 (2.3)         |
| All-cause mortality, N(%)             | 479 (9.3)          | 302 (5.6)         | 283 (5.1)         | 306 (5.5)         | 334 (5.9)         |

|                                   |           |           |           |           |           |
|-----------------------------------|-----------|-----------|-----------|-----------|-----------|
| Cardiovascular mortality, N(%)    | 204 (4.0) | 164 (3.0) | 177 (3.2) | 200 (3.6) | 215 (3.8) |
| Noncardiovascular mortality, N(%) | 275 (5.4) | 138 (2.6) | 106 (1.9) | 106 (1.9) | 119 (2.1) |

LDL-C, low-density lipoprotein cholesterol; HDL-C, high-density lipoprotein cholesterol; APACHE score, Acute Physiology, Age, and Chronic Health Evaluation score; ASCVD, atherosclerosis cardiovascular disease; COPD, chronic obstructive pulmonary disease.

**eTable 2. Baseline Characteristics of individuals according to quintiles of total cholesterol levels**

| Baseline TC                           | 1st Quintile<br>≤110mg/dL | 2nd Quintile<br>111-135<br>mg/dL | 3rd Quintile<br>136-158<br>mg/dL | 4th Quintile<br>159-188<br>mg/dL | 5th Quintile<br>≥189mg/dL |
|---------------------------------------|---------------------------|----------------------------------|----------------------------------|----------------------------------|---------------------------|
| N(%)                                  | 5270 (19.3)               | 5626 (20.6)                      | 5328 (19.5)                      | 5609 (20.5)                      | 5483 (20.1)               |
| Age, years                            | 68.1 ± 14.5               | 67.6 ± 14.5                      | 66.1 ± 14.7                      | 64.3 ± 14.5                      | 61.3 ± 14.2               |
| Male, N(%)                            | 3421 (64.9)               | 3489 (62.0)                      | 3000 (56.3)                      | 3089 (55.1)                      | 2828 (51.6)               |
| Caucasian, N(%)                       | 3922 (74.4)               | 4264 (75.8)                      | 4028 (75.6)                      | 4124 (73.5)                      | 3966 (72.3)               |
| Body mass index, kg/m <sup>2</sup>    | 27.0 ± 10.1               | 27.3 ± 10.1                      | 27.2 ± 10.1                      | 27.9 ± 9.7                       | 27.8 ± 9.6                |
| Heart rate, bpm                       | 100 ± 32                  | 94 ± 32                          | 92 ± 31                          | 91 ± 31                          | 92 ± 30                   |
| Mean blood pressure, mmHg             | 84 ± 42                   | 91 ± 42                          | 93 ± 41                          | 97 ± 42                          | 100 ± 40                  |
| APACHE score                          | 51(31-69)                 | 45(28-62)                        | 42(25-57)                        | 39(24-54)                        | 36(23-50)                 |
| Glasgow Coma Score                    | 11 ± 5                    | 12 ± 5                           | 12 ± 5                           | 12 ± 5                           | 12 ± 5                    |
| Lab measurement                       |                           |                                  |                                  |                                  |                           |
| LDL-C, mg/dL                          | 41 ± 14                   | 62 ± 14                          | 79 ± 15                          | 99 ± 17                          | 140 ± 34                  |
| HDL-C, mg/dL                          | 30 ± 13                   | 39 ± 13                          | 43 ± 15                          | 46 ± 16                          | 48 ± 19                   |
| Total cholesterol, mg/dL              | 91 ± 15                   | 124 ± 7                          | 147 ± 7                          | 173 ± 9                          | 223 ± 36                  |
| Triglyceride, mg/dL                   | 88(64-122)                | 98(72-138)                       | 106(76-151)                      | 119(84-170)                      | 146(100-215)              |
| White blood cell, *10 <sup>9</sup> /L | 10.1<br>(7.1-14.4)        | 9.6<br>(7.0-12.9)                | 9.4<br>(6.8-12.5)                | 9.3<br>(6.9-12.5)                | 9.6 (7.1-12.6)            |
| Hemoglobin, g/dL                      | 10.4 ± 3.0                | 11.0 ± 3.3                       | 11.2 ± 3.8                       | 11.4 ± 4.0                       | 11.6 ± 4.2                |
| Platelet, *10 <sup>9</sup> /L         | 180<br>(128-242)          | 186<br>(140-238)                 | 193<br>(146-242)                 | 199<br>(151-244)                 | 204<br>(155-252)          |
| Albumin, g/L                          | 27.2 ± 6.3                | 30.1 ± 5.8                       | 31.4 ± 5.6                       | 32.4 ± 5.6                       | 33.3 ± 6.0                |
| Primary disease of admission          |                           |                                  |                                  |                                  |                           |
| Circulatory disease, N(%)             | 2648 (50.2)               | 3652 (64.9)                      | 3752 (70.4)                      | 4025 (71.8)                      | 4065 (74.1)               |
| Respiratory disease, N(%)             | 625 (11.9)                | 462 (8.2)                        | 369 (6.9)                        | 330 (5.9)                        | 243 (4.4)                 |
| Digestive disease, N(%)               | 437 (8.3)                 | 243 (4.3)                        | 141 (2.6)                        | 91 (1.6)                         | 101 (1.8)                 |
| Neurological disease, N(%)            | 199 (3.8)                 | 224 (4.0)                        | 210 (3.9)                        | 251 (4.5)                        | 249 (4.5)                 |
| Genitourinary disease, N(%)           | 284 (5.4)                 | 143 (2.5)                        | 100 (1.9)                        | 73 (1.3)                         | 53 (1.0)                  |
| Endocrine disease, N(%)               | 98 (1.9)                  | 104 (1.8)                        | 89 (1.7)                         | 123 (2.2)                        | 165 (3.0)                 |
| Pre-admission comorbidities           |                           |                                  |                                  |                                  |                           |
| ASCVD, N(%)                           | 1970 (37.4)               | 2001 (35.6)                      | 1693 (31.8)                      | 1494 (26.6)                      | 1403 (25.6)               |
| Diabetes, N(%)                        | 1539 (29.2)               | 1457 (25.9)                      | 1183 (22.2)                      | 1062 (18.9)                      | 999 (18.2)                |
| Hypertension, N(%)                    | 2826 (53.6)               | 3185 (56.6)                      | 2892 (54.3)                      | 2948 (52.6)                      | 2784 (50.8)               |
| Heart failure, N(%)                   | 1010 (19.2)               | 856 (15.2)                       | 616 (11.6)                       | 562 (10.0)                       | 428 (7.8)                 |
| COPD, N(%)                            | 696 (13.2)                | 683 (12.1)                       | 609 (11.4)                       | 527 (9.4)                        | 457 (8.3)                 |
| Renal failure, N(%)                   | 841 (16.0)                | 625 (11.1)                       | 458 (8.6)                        | 379 (6.8)                        | 316 (5.8)                 |

| Medication                        |             |             |             |             |             |
|-----------------------------------|-------------|-------------|-------------|-------------|-------------|
| Lipid-lowering drugs, N(%)        | 1797 (34.1) | 1998 (35.5) | 1882 (35.3) | 1954 (34.8) | 2084 (38.0) |
| Antiplatelet drugs, N(%)          | 669 (12.7)  | 635 (11.3)  | 506 (9.5)   | 502 (8.9)   | 422 (7.7)   |
| Anticoagulants, N(%)              | 202 (3.8)   | 178 (3.2)   | 138 (2.6)   | 104 (1.9)   | 70 (1.3)    |
| Mechanical ventilation, N(%)      | 1268 (24.1) | 1098 (19.5) | 908 (17.0)  | 833 (14.9)  | 711 (13.0)  |
| Dialysis, N(%)                    | 261 (5.0)   | 165 (2.9)   | 102 (1.9)   | 82 (1.5)    | 61 (1.1)    |
| All-cause mortality, N(%)         | 564 (10.7)  | 392 (7.0)   | 292 (5.5)   | 250 (4.5)   | 206 (3.8)   |
| Cardiovascular mortality, N(%)    | 244 (4.6)   | 223 (4.0)   | 183 (3.4)   | 161 (2.9)   | 149 (2.7)   |
| Noncardiovascular mortality, N(%) | 320 (6.1)   | 169 (3.0)   | 109 (2.0)   | 89 (1.6)    | 57 (1.0)    |

LDL-C, low density-lipoprotein cholesterol; HDL-C, high-density lipoprotein cholesterol; APACHE score, Acute Physiology, Age, and Chronic Health Evaluation score; ASCVD, atherosclerosis cardiovascular disease; COPD, chronic obstructive pulmonary disease.

**eTable 3. Baseline Characteristics of individuals according to quintiles of triglyceride levels**

| Baseline TG                           | 1st Quintile      | 2nd Quintile      | 3rd Quintile     | 4th Quintile     | 5th Quintile      |
|---------------------------------------|-------------------|-------------------|------------------|------------------|-------------------|
|                                       | ≤70mg/dL          | 71-94mg/dL        | 95-124mg/dL      | 125-174mg/dL     | ≥175mg/dL         |
| N(%)                                  | 5444 (19.9)       | 5332 (19.5)       | 5578 (20.4)      | 5470 (20.0)      | 5492 (20.1)       |
| Age, years                            | 68.6 ± 15.3       | 68.0 ± 14.6       | 66.4 ± 14.0      | 63.9 ± 14.1      | 60.4 ± 13.7       |
| Male, N(%)                            | 3155 (58.0)       | 3038 (57.0)       | 3222 (57.8)      | 3149 (57.6)      | 3263 (59.4)       |
| Caucasian, N(%)                       | 3933 (72.2)       | 3957 (74.2)       | 4168 (74.7)      | 4070 (74.4)      | 4176 (76.0)       |
| Body mass index, kg/m <sup>2</sup>    | 25.4 ± 9.3        | 26.4 ± 9.8        | 27.4 ± 9.8       | 28.5 ± 10.0      | 29.4 ± 10.1       |
| Heart rate, bpm                       | 94 ± 32           | 94 ± 32           | 94 ± 31          | 94 ± 31          | 93 ± 30           |
| Mean blood pressure, mmHg             | 91 ± 42           | 92 ± 42           | 93 ± 42          | 95 ± 42          | 95 ± 42           |
| APACHE score                          | 44 (28-60)        | 44 (27-60)        | 42 (26-59)       | 41 (24-57)       | 39 (23-56)        |
| Glasgow Coma Score                    | 12 ± 5            | 12 ± 5            | 12 ± 5           | 12 ± 5           | 12 ± 5            |
| Lab measurement                       |                   |                   |                  |                  |                   |
| LDL-C, mg/dL                          | 72 ± 33           | 80 ± 35           | 85 ± 37          | 91 ± 41          | 94 ± 46           |
| HDL-C, mg/dL                          | 50 ± 19           | 45 ± 17           | 41 ± 15          | 38 ± 14          | 34 ± 12           |
| Total cholesterol, mg/dL              | 134 ± 42          | 141 ± 42          | 148 ± 43         | 158 ± 47         | 178 ± 54          |
| Triglyceride, mg/dL                   | 55 ± 11           | 82 ± 7            | 109 ± 9          | 147 ± 14         | 251 ± 81          |
| White blood cell, *10 <sup>9</sup> /L | 9.0<br>(6.5-12.3) | 9.5<br>(7.0-12.8) | 9.6 (7.1-12.9)   | 9.8 (7.2-13.1)   | 9.9<br>(7.2-13.3) |
| Hemoglobin, g/dL                      | 11.0 ± 3.5        | 11.0 ± 3.6        | 11.2 ± 3.7       | 11.2 ± 4.0       | 11.3 ± 4.0        |
| Platelet, *10 <sup>9</sup> /L         | 185<br>(137-236)  | 193<br>(142-245)  | 195<br>(144-248) | 197<br>(148-246) | 194<br>(146-245)  |
| Albumin, g/L                          | 30.4 ± 6.0        | 30.5 ± 6.2        | 30.5 ± 6.1       | 30.6 ± 6.4       | 31.1 ± 6.6        |
| Primary disease of admission          |                   |                   |                  |                  |                   |
| Circulatory disease, N(%)             | 3535 (64.9)       | 3570 (67.0)       | 3766 (67.5)      | 3621 (66.2)      | 3650 (66.5)       |
| Respiratory disease, N(%)             | 529 (9.7)         | 425 (8.0)         | 370 (6.6)        | 381 (7.0)        | 324 (5.9)         |
| Digestive disease, N(%)               | 185 (3.4)         | 190 (3.6)         | 220 (3.9)        | 214 (3.9)        | 204 (3.7)         |
| Neurological disease, N(%)            | 239 (4.4)         | 238 (4.5)         | 239 (4.3)        | 219 (4.0)        | 198 (3.6)         |
| Genitourinary disease, N(%)           | 120 (2.2)         | 100 (1.9)         | 123 (2.2)        | 150 (2.7)        | 160 (2.9)         |
| Endocrine disease, N(%)               | 81 (1.5)          | 68 (1.3)          | 88 (1.6)         | 132 (2.4)        | 210 (3.8)         |
| Pre-admission comorbidities           |                   |                   |                  |                  |                   |

|                                    |             |             |             |             |             |
|------------------------------------|-------------|-------------|-------------|-------------|-------------|
| ASCVD, N(%)                        | 1674 (30.7) | 1679 (31.5) | 1850 (33.2) | 1639 (30.0) | 1719 (31.3) |
| Diabetes, N(%)                     | 946 (17.4)  | 1011 (19.0) | 1245 (22.3) | 1356 (24.8) | 1682 (30.6) |
| Hypertension, N(%)                 | 2821 (51.8) | 2874 (53.9) | 2991 (53.6) | 2997 (54.8) | 2952 (53.8) |
| Heart failure, N(%)                | 843 (15.5)  | 794 (14.9)  | 724 (13.0)  | 614 (11.2)  | 497 (9.0)   |
| COPD, N(%)                         | 693 (12.7)  | 616 (11.6)  | 598 (10.7)  | 570 (10.4)  | 495 (9.0)   |
| Renal failure, N(%)                | 546 (10.0)  | 534 (10.0)  | 520 (9.3)   | 502 (9.2)   | 517 (9.4)   |
| <b>Medication</b>                  |             |             |             |             |             |
| Lipid-lowering drugs, N(%)         | 1768 (32.5) | 1840 (34.5) | 1935 (34.7) | 2031 (37.1) | 2141 (39.0) |
| Antiplatelet drugs, N(%)           | 570 (10.5)  | 544 (10.2)  | 570 (10.2)  | 511 (9.3)   | 539 (9.8)   |
| Anticoagulants, N(%)               | 178 (3.3)   | 167 (3.1)   | 147 (2.6)   | 123 (2.2)   | 77 (1.4)    |
| Mechanical ventilation, N(%)       | 945 (17.4)  | 925 (17.3)  | 980 (17.6)  | 987 (18.0)  | 981 (17.9)  |
| Dialysis, N(%)                     | 144 (2.6)   | 123 (2.3)   | 139 (2.5)   | 125 (2.3)   | 140 (2.5)   |
| All-cause mortality, N(%)          | 371 (6.8)   | 362 (6.8)   | 360 (6.5)   | 313 (5.7)   | 298 (5.4)   |
| Cardiovascular mortality, N(%)     | 219 (4.0)   | 205 (3.8)   | 203 (3.6)   | 168 (3.1)   | 165 (3.0)   |
| Non-cardiovascular mortality, N(%) | 152 (2.8)   | 157 (2.9)   | 157 (2.8)   | 145 (2.7)   | 133 (2.4)   |

LDL-C, low-density lipoprotein cholesterol; HDL-C, high-density lipoprotein cholesterol; APACHE score, Acute Physiology, Age, and Chronic Health Evaluation score; ASCVD, atherosclerosis cardiovascular disease; COPD, chronic obstructive pulmonary disease.

**eTable 4. Unadjusted and adjusted odds ratios for all-cause mortality by quintiles of LDL-C, HDL-C, total cholesterol and triglyceride levels**

| All-cause mortality      | Quintile 1        | Quintile 2        | Quintile 3        | Quintile 4        | Quintile 5        |
|--------------------------|-------------------|-------------------|-------------------|-------------------|-------------------|
|                          | OR (95% CI)       | OR (95% CI)       | OR (95% CI)       | OR (95% CI)       | OR (95% CI)       |
| <b>LDL-C</b>             |                   |                   |                   |                   |                   |
| Model I                  | 3.22 (2.72, 3.80) | 1.98 (1.66, 2.37) | 1.60 (1.34, 1.93) | 1.32 (1.09, 1.59) | reference         |
| Model II                 | 2.75 (2.32, 3.26) | 1.72 (1.44, 2.05) | 1.44 (1.20, 1.73) | 1.22 (1.01, 1.48) | reference         |
| Model III                | 1.46 (1.20, 1.77) | 1.23 (1.01, 1.50) | 1.17 (0.96, 1.43) | 1.06 (0.87, 1.30) | reference         |
| <b>HDL-C</b>             |                   |                   |                   |                   |                   |
| Model I                  | 1.78 (1.53, 2.06) | 1.02 (0.87, 1.20) | 0.93 (0.79, 1.10) | reference         | 1.08 (0.92, 1.27) |
| Model II                 | 2.06 (1.77, 2.39) | 1.13 (0.96, 1.33) | 0.99 (0.83, 1.17) | reference         | 1.02 (0.87, 1.20) |
| Model III                | 1.31 (1.10, 1.57) | 0.99 (0.83, 1.19) | 0.95 (0.79, 1.14) | reference         | 1.01 (0.84, 1.20) |
| <b>Total cholesterol</b> |                   |                   |                   |                   |                   |
| Model I                  | 2.57 (2.20, 3.00) | 1.61 (1.36, 1.89) | 1.24 (1.05, 1.48) | reference         | 0.84 (0.69, 1.01) |
| Model II                 | 2.40 (2.06, 2.81) | 1.50 (1.27, 1.77) | 1.19 (1.00, 1.42) | reference         | 0.90 (0.74, 1.08) |
| Model III                | 1.52 (1.25, 1.87) | 1.29 (1.07, 1.55) | 1.11 (0.91, 1.34) | reference         | 0.96 (0.78, 1.19) |
| <b>Triglyceride</b>      |                   |                   |                   |                   |                   |
| Model I                  | 1.20 (1.03, 1.41) | 1.20 (1.03, 1.40) | 1.14 (0.97, 1.33) | reference         | 0.95 (0.80, 1.11) |
| Model II                 | 1.05 (0.89, 1.22) | 1.06 (0.91, 1.25) | 1.06 (0.91, 1.24) | reference         | 1.05 (0.89, 1.23) |
| Model III                | 1.05 (0.83, 1.32) | 1.06 (0.86, 1.30) | 1.10 (0.92, 1.33) | reference         | 1.02 (0.80, 1.29) |

Model I, unadjusted model; Model II, all cause mortality adjusted by age, sex and ethnicity; Model III, all cause mortality adjusted by age, sex, ethnicity, body mass index, heart rate, mean blood pressure, disease severity score (APACHE score and Glasgow coma score), lab measurements (LDL-C, HDL-C, total cholesterol, triglyceride, white blood cell, hemoglobin, platelet and albumin), primary disease of admission (circulatory disease, respiratory

disease, digestive disease, neurological disease, genitourinary disease and endocrine disease), pre-admission comorbidities (ASCVD, diabetes, hypertension, heart failure, chronic obstructive pulmonary disease and renal dysfunction), medication (lipid-lowering therapy, antiplatelet drug and anticoagulant), mechanical ventilation and dialysis. ASCVD, atherosclerosis cardiovascular diseases. COPD, chronic obstructive pulmonary disease. OR, odds ratio. CI, confidence intervals.

**eTable 5. Unadjusted and adjusted odds ratios for cardiovascular mortality by quintiles of LDL-C, HDL-C, total cholesterol and triglyceride levels**

| <b>Cardiovascular mortality</b> | <b>Quintile 1</b> | <b>Quintile 2</b> | <b>Quintile 3</b> | <b>Quintile 4</b> | <b>Quintile 5</b> |
|---------------------------------|-------------------|-------------------|-------------------|-------------------|-------------------|
|                                 | OR (95% CI)       | OR (95% CI)       | OR (95% CI)       | OR (95% CI)       | OR (95% CI)       |
| <b>LDL-C</b>                    |                   |                   |                   |                   |                   |
| Model I                         | 1.91 (1.55, 2.34) | 1.49 (1.20, 1.85) | 1.24 (0.99, 1.55) | 1.19 (0.95, 1.49) | reference         |
| Model II                        | 1.56 (1.26, 1.93) | 1.24 (1.00, 1.54) | 1.08 (0.86, 1.35) | 1.08 (0.86, 1.35) | reference         |
| Model III                       | 1.17 (0.91, 1.50) | 1.05 (0.82, 1.35) | 0.96 (0.74, 1.23) | 0.97 (0.76, 1.24) | reference         |
| <b>HDL-C</b>                    |                   |                   |                   |                   |                   |
| Model I                         | 1.11 (0.91, 1.36) | 0.84 (0.68, 1.04) | 0.89 (0.73, 1.10) | reference         | 1.06 (0.87, 1.29) |
| Model II                        | 1.28 (1.05, 1.57) | 0.93 (0.75, 1.15) | 0.94 (0.77, 1.16) | reference         | 1.01 (0.83, 1.23) |
| Model III                       | 1.24 (0.98, 1.57) | 0.88 (0.69, 1.11) | 0.87 (0.70, 1.10) | reference         | 0.96 (0.77, 1.20) |
| <b>Total cholesterol</b>        |                   |                   |                   |                   |                   |
| Model I                         | 1.64 (1.34, 2.01) | 1.40 (1.14, 1.72) | 1.20 (0.97, 1.49) | reference         | 0.95 (0.75, 1.18) |
| Model II                        | 1.49 (1.21, 1.83) | 1.28 (1.04, 1.57) | 1.14 (0.92, 1.42) | reference         | 1.03 (0.82, 1.30) |
| Model III                       | 1.38 (0.90, 1.79) | 1.21 (0.95, 1.53) | 1.07 (0.84, 1.36) | reference         | 1.09 (0.85, 1.40) |
| <b>Triglyceride</b>             |                   |                   |                   |                   |                   |
| Model I                         | 1.32 (1.08, 1.62) | 1.26 (1.03, 1.55) | 1.19 (0.97, 1.47) | reference         | 0.98 (0.79, 1.22) |
| Model II                        | 1.13 (0.92, 1.39) | 1.10 (0.89, 1.36) | 1.10 (0.90, 1.36) | reference         | 1.10 (0.88, 1.37) |
| Model III                       | 1.09 (0.78, 1.54) | 1.05 (0.79, 1.41) | 1.08 (0.84, 1.39) | reference         | 1.15 (0.82, 1.63) |

Model I, unadjusted model; Model II, all cause mortality adjusted by age, sex and ethnicity; Model III, all cause mortality adjusted by age, sex, ethnicity, body mass index, heart rate, mean blood pressure, disease severity score (APACHE score and Glasgow coma score), lab measurements (LDL-C, HDL-C, total cholesterol, triglyceride, white blood cell, hemoglobin, platelet and albumin), primary disease of admission (circulatory disease, respiratory disease, digestive disease, neurological disease, genitourinary disease and endocrine disease), pre-admission comorbidities (ASCVD, diabetes, hypertension, heart failure, chronic obstructive pulmonary disease and renal dysfunction), medication (lipid-lowering therapy, antiplatelet drug and anticoagulant), mechanical ventilation and dialysis. ASCVD, atherosclerosis cardiovascular diseases. COPD, chronic obstructive pulmonary disease. OR, odds ratio. CI, confidence intervals.

**eTable 6. Unadjusted and adjusted odds ratios for non-cardiovascular mortality by quintiles of LDL-C, HDL-C, total cholesterol and triglyceride levels**

| <b>Noncardiovascular mortality</b> | <b>Quintile 1</b> | <b>Quintile 2</b> | <b>Quintile 3</b> | <b>Quintile 4</b> | <b>Quintile 5</b> |
|------------------------------------|-------------------|-------------------|-------------------|-------------------|-------------------|
|                                    | OR (95% CI)       | OR (95% CI)       | OR (95% CI)       | OR (95% CI)       | OR (95% CI)       |
| <b>LDL-C</b>                       |                   |                   |                   |                   |                   |
| Model I                            | 6.33 (4.72, 8.50) | 3.20 (2.34, 4.36) | 2.53 (1.84, 3.49) | 1.65 (1.17, 2.33) | reference         |

|                          |                   |                   |                   |                   |                   |
|--------------------------|-------------------|-------------------|-------------------|-------------------|-------------------|
| Model II                 | 5.73 (4.26, 7.71) | 2.91 (2.13, 3.98) | 2.36 (1.71, 3.26) | 1.57 (1.12, 2.22) | reference         |
| Model III                | 1.88 (1.36, 2.61) | 1.57 (1.12, 2.18) | 1.64 (1.17, 2.29) | 1.27 (0.89, 1.82) | reference         |
| <b>HDL-C</b>             |                   |                   |                   |                   |                   |
| Model I                  | 2.93 (2.33, 3.67) | 1.35 (1.05, 1.75) | 1.01 (0.77, 1.33) | reference         | 1.11 (0.85, 1.45) |
| Model II                 | 3.34 (2.66, 4.21) | 1.49 (1.15, 1.93) | 1.07 (0.81, 1.40) | reference         | 1.05 (0.80, 1.37) |
| Model III                | 1.44 (1.10, 1.87) | 1.23 (0.93, 1.64) | 1.14 (0.85, 1.54) | reference         | 1.07 (0.80, 1.43) |
| <b>Total cholesterol</b> |                   |                   |                   |                   |                   |
| Model I                  | 4.01 (3.16, 5.09) | 1.92 (1.48, 2.49) | 1.30 (0.98, 1.72) | reference         | 0.65 (0.47, 0.91) |
| Model II                 | 3.88 (3.05, 4.93) | 1.85 (1.43, 2.40) | 1.26 (0.95, 1.67) | reference         | 0.68 (0.48, 0.95) |
| Model III                | 1.59 (1.17, 2.16) | 1.36 (1.01, 1.83) | 1.15 (0.84, 1.57) | reference         | 0.79 (0.55, 1.15) |
| <b>Triglyceride</b>      |                   |                   |                   |                   |                   |
| Model I                  | 1.05 (0.84, 1.33) | 1.11 (0.89, 1.40) | 1.06 (0.85, 1.34) | reference         | 0.91 (0.72, 1.16) |
| Model II                 | 0.95 (0.75, 1.20) | 1.02 (0.81, 1.28) | 1.01 (0.80, 1.27) | reference         | 0.98 (0.77, 1.25) |
| Model III                | 0.94 (0.68, 1.29) | 1.06 (0.79, 1.41) | 1.12 (0.86, 1.47) | reference         | 0.93 (0.67, 1.28) |

Model I, unadjusted model; Model II, all cause mortality adjusted by age, sex and ethnicity; Model III, all cause mortality adjusted by age, sex, ethnicity, body mass index, heart rate, mean blood pressure, disease severity score (APACHE score and Glasgow coma score), lab measurements (LDL-C, HDL-C, total cholesterol, triglyceride, white blood cell, hemoglobin, platelet and albumin), primary disease of admission (circulatory disease, respiratory disease, digestive disease, neurological disease, genitourinary disease and endocrine disease), pre-admission comorbidities (ASCVD, diabetes, hypertension, heart failure, chronic obstructive pulmonary disease and renal dysfunction), medication (lipid-lowering therapy, antiplatelet drug and anticoagulant), mechanical ventilation and dialysis. ASCVD, atherosclerosis cardiovascular diseases. COPD, chronic obstructive pulmonary disease. OR, odds ratio. CI, confidence intervals.

**eTable 7. Univariable and multivariable analysis for all-cause mortality with lipid levels below or above the risk inflection point**

| Lipid level                               | Model I<br>OR (95% CI) | Model II<br>OR (95% CI) | Model III<br>OR (95% CI) |
|-------------------------------------------|------------------------|-------------------------|--------------------------|
| <b>LDL-C level</b>                        |                        |                         |                          |
| Increase per 10 mg/dL ( $\leq 96$ mg/dL)  | 0.84 (0.81, 0.86)      | 0.85 (0.81, 0.87)       | 0.92 (0.89, 0.95)        |
| Increase per 10 mg/dL ( $> 96$ mg/dL)     | 0.97 (0.92, 1.01)      | 0.99 (0.97, 1.03)       | 1.03 (0.97, 1.06)        |
| <b>HDL-C level</b>                        |                        |                         |                          |
| Increase per 10 mg/dL ( $\leq 27$ mg/dL)  | 0.52 (0.45, 0.60)      | 0.51 (0.41, 0.60)       | 0.64 (0.50, 0.75)        |
| Increase per 10 mg/dL ( $> 27$ mg/dL)     | 1.04 (1.00, 1.09)      | 1.01 (0.95, 1.05)       | 1.02 (0.95, 1.06)        |
| <b>total cholesterol level</b>            |                        |                         |                          |
| Increase per 10 mg/dL ( $\leq 140$ mg/dL) | 0.85 (0.80, 0.87)      | 0.85 (0.82, 0.87)       | 0.91 (0.86, 0.96)        |
| Increase per 10 mg/dL ( $> 140$ mg/dL)    | 0.95 (0.94, 0.98)      | 0.98 (0.93, 1.01)       | 0.99 (0.97, 1.03)        |

Model I, unadjusted model; Model II, all cause mortality adjusted by age, sex and ethnicity; Model III, all cause mortality adjusted by age, sex, ethnicity, body mass index, heart rate, mean blood pressure, disease severity score (APACHE score and Glasgow coma score), lab measurements (LDL-C, HDL-C, total cholesterol, triglyceride, white blood cell, hemoglobin, platelet and albumin), primary disease of admission (circulatory disease, respiratory disease, digestive disease, neurological disease, genitourinary disease and endocrine disease), pre-admission comorbidities (ASCVD, diabetes, hypertension, heart failure, chronic obstructive pulmonary disease and renal dysfunction), medication (lipid-lowering therapy, antiplatelet drug and anticoagulant), mechanical ventilation and dialysis. ASCVD, atherosclerosis cardiovascular diseases. COPD, chronic obstructive pulmonary disease. OR, odds ratio. CI, confidence intervals.



dysfunction), medication (lipid-lowering therapy, antiplatelet drug and anticoagulant), mechanical ventilation and dialysis. ASCVD, atherosclerosis cardiovascular diseases. COPD, chronic obstructive pulmonary disease. OR, odds ratio. CI, confidence intervals.

**eTable 8. Unadjusted and adjusted odds ratios for all-cause mortality by LDL-C level combined with HDL-C level**

| Lipid level                        | Model I<br>OR (95% CI) | Model II<br>OR (95% CI) | Model III<br>OR (95% CI) |
|------------------------------------|------------------------|-------------------------|--------------------------|
| <b>All-cause mortality</b>         |                        |                         |                          |
| LDL≤96, HDL≤27 mg/dL               | 3.03 (2.60, 3.54)      | 3.04 (2.60, 3.54)       | 1.52 (1.26, 1.82)        |
| LDL>96, HDL≤27 mg/dL               | 1.75 (1.53, 1.99)      | 1.53 (1.34, 1.75)       | 1.43 (1.02, 1.92)        |
| LDL≤96, HDL>27 mg/dL               | 1.50 (1.09, 2.08)      | 1.79 (1.29, 2.49)       | 1.22 (1.06, 1.41)        |
| LDL>96, HDL>27 mg/dL               | reference              | reference               | reference                |
| <b>Cardiovascular mortality</b>    |                        |                         |                          |
| LDL≤96, HDL≤27 mg/dL               | 1.61 (1.32, 1.98)      | 1.59 (1.29, 1.95)       | 1.37 (1.07, 1.76)        |
| LDL>96, HDL≤27 mg/dL               | 1.35 (1.15, 1.57)      | 1.16 (0.99, 1.35)       | 1.00 (0.59, 1.68)        |
| LDL≤96, HDL>27 mg/dL               | 0.91 (0.57, 1.45)      | 1.10 (0.69, 1.75)       | 1.02 (0.86, 1.22)        |
| LDL>96, HDL>27 mg/dL               | reference              | reference               | reference                |
| <b>Noncardiovascular mortality</b> |                        |                         |                          |
| LDL≤96, HDL≤27 mg/dL               | 6.55 (5.09, 8.43)      | 6.58 (5.11, 8.48)       | 1.82 (1.37, 2.43)        |
| LDL>96, HDL≤27 mg/dL               | 2.75 (2.17, 3.48)      | 2.48 (1.96, 3.15)       | 1.93 (1.18, 2.88)        |
| LDL≤96, HDL>27 mg/dL               | 3.08 (1.94, 4.87)      | 3.56 (2.24, 5.64)       | 1.64 (1.27, 2.10)        |
| LDL>96, HDL>27 mg/dL               | reference              | reference               | reference                |

Model I, unadjusted model; Model II, all cause mortality adjusted by age, sex and ethnicity; Model III, all cause mortality adjusted by age, sex, ethnicity, body mass index, heart rate, mean blood pressure, disease severity score (APACHE score and Glasgow coma score), lab measurements (LDL-C, HDL-C, total cholesterol, triglyceride, white blood cell, hemoglobin, platelet and albumin), primary disease of admission (circulatory disease, respiratory disease, digestive disease, neurological disease, genitourinary disease and endocrine disease), pre-admission comorbidities (ASCVD, diabetes, hypertension, heart failure, chronic obstructive pulmonary disease and renal dysfunction), medication (lipid-lowering therapy, antiplatelet drug and anticoagulant), mechanical ventilation and dialysis. ASCVD, atherosclerosis cardiovascular diseases. COPD, chronic obstructive pulmonary disease. OR, odds ratio. CI, confidence intervals.

**eTable 9. Unadjusted and adjusted odds ratios for all-cause mortality according to quintiles of LDL-C, HDL-C, total cholesterol and triglyceride levels by excluding death within the first 24 hours of ICU entry (n=27097)**

| All-cause mortality | Quintile 1<br>OR (95% CI) | Quintile 2<br>OR (95% CI) | Quintile 3<br>OR (95% CI) | Quintile 4<br>OR (95% CI) | Quintile 5<br>OR (95% CI) |
|---------------------|---------------------------|---------------------------|---------------------------|---------------------------|---------------------------|
| <b>LDL-C</b>        |                           |                           |                           |                           |                           |
| Model I             | 3.33 (2.78, 3.98)         | 2.07 (1.71, 2.50)         | 1.69 (1.39, 2.06)         | 1.32 (1.08, 1.62)         | reference                 |
| Model II            | 2.88 (2.40, 3.46)         | 1.81 (1.49, 2.19)         | 1.53 (1.26, 1.86)         | 1.23 (1.00, 1.51)         | reference                 |
| Model III           | 1.57 (1.28, 1.93)         | 1.31 (1.06, 1.61)         | 1.25 (1.01, 1.54)         | 1.09 (0.88, 1.35)         | reference                 |

| <b>HDL-C</b>             |                   |                   |                   |           |                   |  |
|--------------------------|-------------------|-------------------|-------------------|-----------|-------------------|--|
| Model I                  | 1.82 (1.55, 2.13) | 1.07 (0.90, 1.27) | 0.96 (0.81, 1.15) | reference | 1.11 (0.94, 1.32) |  |
| Model II                 | 2.09 (1.77, 2.45) | 1.17 (0.98, 1.40) | 1.01 (0.85, 1.21) | reference | 1.06 (0.89, 1.25) |  |
| Model III                | 1.25 (1.05, 1.44) | 1.00 (0.83, 1.21) | 0.94 (0.78, 1.13) | reference | 1.05 (0.87, 1.26) |  |
| <b>Total cholesterol</b> |                   |                   |                   |           |                   |  |
| Model I                  | 2.52 (2.14, 2.97) | 1.62 (1.36, 1.92) | 1.25 (1.04, 1.50) | reference | 0.79 (0.65, 0.97) |  |
| Model II                 | 2.37 (2.01, 2.79) | 1.52 (1.28, 1.81) | 1.20 (1.00, 1.44) | reference | 0.84 (0.69, 1.03) |  |
| Model III                | 1.42 (1.18, 1.71) | 1.24 (1.03, 1.50) | 1.10 (0.91, 1.34) | reference | 0.90 (0.73, 1.12) |  |
| <b>Triglyceride</b>      |                   |                   |                   |           |                   |  |
| Model I                  | 1.18 (1.00, 1.40) | 1.16 (0.98, 1.37) | 1.15 (0.98, 1.36) | reference | 0.95 (0.80, 1.13) |  |
| Model II                 | 1.04 (0.88, 1.22) | 1.03 (0.87, 1.22) | 1.08 (0.91, 1.27) | reference | 1.04 (0.87, 1.24) |  |
| Model III                | 1.11 (0.92, 1.33) | 1.08 (0.90, 1.30) | 1.11 (0.93, 1.33) | reference | 0.98 (0.81, 1.19) |  |

Model I, unadjusted model; Model II, all cause mortality adjusted by age, sex and ethnicity; Model III, all cause mortality adjusted by age, sex, ethnicity, body mass index, heart rate, mean blood pressure, disease severity score (APACHE score and Glasgow coma score), lab measurements (LDL-C, HDL-C, total cholesterol, triglyceride, white blood cell, hemoglobin, platelet and albumin), primary disease of admission (circulatory disease, respiratory disease, digestive disease, neurological disease, genitourinary disease and endocrine disease), pre-admission comorbidities (ASCVD, diabetes, hypertension, heart failure, chronic obstructive pulmonary disease and renal dysfunction), medication (lipid-lowering therapy, antiplatelet drug and anticoagulant), mechanical ventilation and dialysis. ASCVD, atherosclerosis cardiovascular diseases. COPD, chronic obstructive pulmonary disease. OR, odds ratio. CI, confidence intervals.

**eTable 10. Unadjusted and adjusted odds ratios for all-cause mortality according to quintiles of LDL-C, HDL-C, total cholesterol and triglyceride levels with complete-case analyse (n=21223)**

| <b>All-cause mortality</b> | <b>Quintile 1</b> | <b>Quintile 2</b> | <b>Quintile 3</b> | <b>Quintile 4</b> | <b>Quintile 5</b> |
|----------------------------|-------------------|-------------------|-------------------|-------------------|-------------------|
|                            | OR (95% CI)       | OR (95% CI)       | OR (95% CI)       | OR (95% CI)       | OR (95% CI)       |
| <b>LDL-C</b>               |                   |                   |                   |                   |                   |
| Model I                    | 2.95 (2.44, 3.58) | 1.87 (1.53, 2.29) | 1.46 (1.18, 1.80) | 1.21 (0.97, 1.50) | reference         |
| Model II                   | 2.51 (2.06, 3.05) | 1.61 (1.31, 1.97) | 1.29 (1.04, 1.59) | 1.12 (0.90, 1.39) | reference         |
| Model III                  | 1.29 (1.07, 1.58) | 1.16 (0.93, 1.46) | 1.10 (0.87, 1.38) | 0.99 (0.78, 1.26) | reference         |
| <b>HDL-C</b>               |                   |                   |                   |                   |                   |
| Model I                    | 1.66 (1.40, 1.98) | 1.01 (0.84, 1.22) | 0.88 (0.72, 1.07) | 1.11 (0.92, 1.34) | 1.08 (0.90, 1.30) |
| Model II                   | 1.89 (1.58, 2.25) | 1.10 (0.91, 1.34) | 0.92 (0.76, 1.12) | 1.05 (0.87, 1.27) | 1.03 (0.85, 1.24) |
| Model III                  | 1.28 (1.10, 1.48) | 0.92 (0.75, 1.14) | 0.86 (0.70, 1.06) | 1.11 (0.91, 1.37) | 1.00 (0.81, 1.22) |
| <b>Total cholesterol</b>   |                   |                   |                   |                   |                   |
| Model I                    | 2.55 (2.13, 3.05) | 1.60 (1.32, 1.94) | 1.16 (0.94, 1.42) | reference         | 0.90 (0.72, 1.12) |
| Model II                   | 2.37 (1.97, 2.84) | 1.49 (1.23, 1.80) | 1.10 (0.90, 1.36) | reference         | 0.97 (0.78, 1.20) |
| Model III                  | 1.31 (1.04, 1.66) | 1.18 (0.95, 1.47) | 0.99 (0.79, 1.24) | reference         | 0.98 (0.77, 1.25) |
| <b>Triglyceride</b>        |                   |                   |                   |                   |                   |
| Model I                    | 1.38 (1.15, 1.66) | 1.31 (1.09, 1.58) | 1.32 (1.09, 1.59) | reference         | 1.03 (0.85, 1.26) |
| Model II                   | 1.21 (1.00, 1.46) | 1.17 (0.97, 1.41) | 1.23 (1.02, 1.49) | reference         | 1.15 (0.94, 1.40) |
| Model III                  | 1.29 (0.99, 1.67) | 1.23 (0.97, 1.55) | 1.28 (0.89, 1.59) | reference         | 1.07 (0.81, 1.40) |

Model I, unadjusted model; Model II, all cause mortality adjusted by age, sex and ethnicity; Model III, all cause

mortality adjusted by age, sex, ethnicity, body mass index, heart rate, mean blood pressure, disease severity score (APACHE score and Glasgow coma score), lab measurements (LDL-C, HDL-C, total cholesterol, triglyceride, white blood cell, hemoglobin, platelet and albumin), primary disease of admission (circulatory disease, respiratory disease, digestive disease, neurological disease, genitourinary disease and endocrine disease), pre-admission comorbidities (ASCVD, diabetes, hypertension, heart failure, chronic obstructive pulmonary disease and renal dysfunction), medication (lipid-lowering therapy, antiplatelet drug and anticoagulant), mechanical ventilation and dialysis. ASCVD, atherosclerosis cardiovascular diseases. COPD, chronic obstructive pulmonary disease. OR, odds ratio. CI, confidence intervals.

**eTable 11. Unadjusted and adjusted odds ratios for all-cause mortality according to quintiles of LDL-C, HDL-C, total cholesterol and triglyceride levels by using the first measurement of ICU admission (n=20388)**

| All-cause mortality      | Quintile 1        | Quintile 2        | Quintile 3        | Quintile 4        | Quintile 5        |
|--------------------------|-------------------|-------------------|-------------------|-------------------|-------------------|
|                          | OR (95% CI)       | OR (95% CI)       | OR (95% CI)       | OR (95% CI)       | OR (95% CI)       |
| <b>LDL-C</b>             |                   |                   |                   |                   |                   |
| Model I                  | 3.25 (2.68, 3.94) | 2.05 (1.67, 2.51) | 1.67 (1.36, 2.07) | 1.32 (1.06, 1.64) | reference         |
| Model II                 | 2.82 (2.32, 3.43) | 1.80 (1.47, 2.21) | 1.52 (1.23, 1.88) | 1.23 (0.99, 1.54) | reference         |
| Model III                | 1.77 (1.44, 2.18) | 1.39 (1.12, 1.72) | 1.29 (1.03, 1.60) | 1.11 (0.88, 1.39) | reference         |
| <b>HDL-C</b>             |                   |                   |                   |                   |                   |
| Model I                  | 1.95 (1.64, 2.33) | 1.12 (0.92, 1.35) | 1.04 (0.86, 1.26) | reference         | 1.15 (0.95, 1.39) |
| Model II                 | 2.22 (1.86, 2.65) | 1.22 (1.01, 1.48) | 1.09 (0.90, 1.32) | reference         | 1.10 (0.91, 1.32) |
| Model III                | 1.53 (1.26, 1.85) | 1.09 (0.89, 1.33) | 1.03 (0.84, 1.26) | reference         | 1.05 (0.86, 1.28) |
| <b>Total cholesterol</b> |                   |                   |                   |                   |                   |
| Model I                  | 2.52 (2.11, 3.00) | 1.59 (1.32, 1.91) | 1.24 (1.02, 1.51) | reference         | 0.78 (0.62, 0.97) |
| Model II                 | 2.36 (1.98, 2.82) | 1.49 (1.24, 1.80) | 1.19 (0.98, 1.45) | reference         | 0.82 (0.66, 1.03) |
| Model III                | 1.63 (1.35, 1.98) | 1.28 (1.05, 1.56) | 1.13 (0.92, 1.38) | reference         | 0.88 (0.70, 1.11) |
| <b>Triglyceride</b>      |                   |                   |                   |                   |                   |
| Model I                  | 1.19 (1.00, 1.42) | 1.23 (1.03, 1.47) | 1.15 (0.96, 1.38) | reference         | 0.93 (0.77, 1.12) |
| Model II                 | 1.05 (0.88, 1.26) | 1.10 (0.92, 1.32) | 1.08 (0.91, 1.30) | reference         | 1.01 (0.84, 1.22) |
| Model III                | 1.09 (0.90, 1.32) | 1.13 (0.94, 1.37) | 1.11 (0.92, 1.35) | reference         | 0.96 (0.79, 1.18) |

Model I, unadjusted model; Model II, all cause mortality adjusted by age, sex and ethnicity; Model III, all cause mortality adjusted by age, sex, ethnicity, body mass index, heart rate, mean blood pressure, disease severity score (APACHE score and Glasgow coma score), lab measurements (LDL-C, HDL-C, total cholesterol, triglyceride, white blood cell, hemoglobin, platelet and albumin), primary disease of admission (circulatory disease, respiratory disease, digestive disease, neurological disease, genitourinary disease and endocrine disease), pre-admission comorbidities (ASCVD, diabetes, hypertension, heart failure, chronic obstructive pulmonary disease and renal dysfunction), medication (lipid-lowering therapy, antiplatelet drug and anticoagulant), mechanical ventilation and dialysis. ASCVD, atherosclerosis cardiovascular diseases. COPD, chronic obstructive pulmonary disease. OR, odds ratio. CI, confidence intervals.

**eFigure 1. Multivariable adjusted odds ratios for all-cause and cause-specific mortality by quintiles of LDL-C, HDL-C, total cholesterol and triglyceride levels in individuals with lipid-lowering therapy**

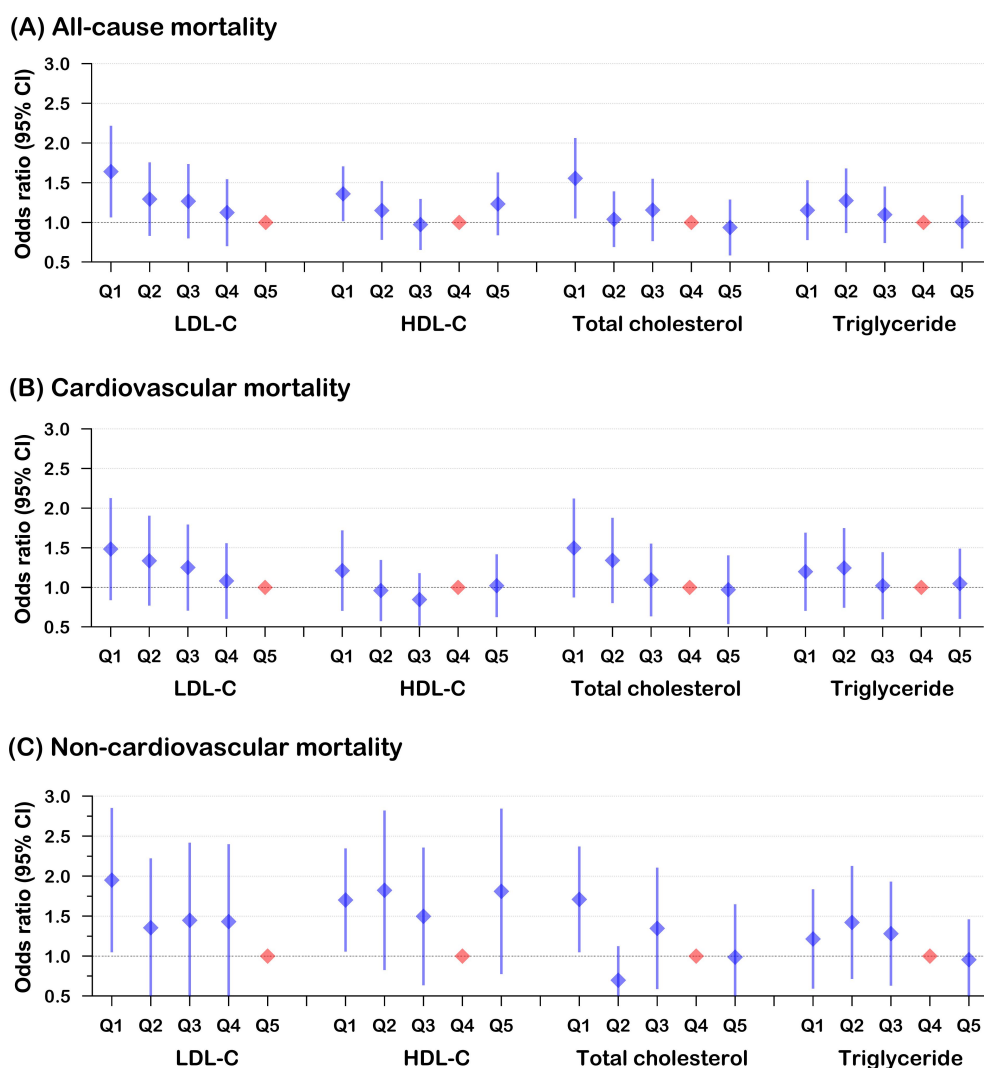

All-cause mortality (A), cardiovascular mortality (B) and non-cardiovascular mortality (C) adjusted by age, sex, ethnicity, body mass index, heart rate, mean blood pressure, disease severity score (APACHE score and Glasgow coma score), lab measurements (LDL-C, HDL-C, total cholesterol, triglyceride, white blood cell, hemoglobin, platelet and albumin), primary disease of admission (circulatory disease, respiratory disease, digestive disease, neurological disease, genitourinary disease and endocrine disease), pre-admission comorbidities (ASCVD, diabetes, hypertension, heart failure, chronic obstructive pulmonary disease and renal dysfunction), medication (lipid-lowering therapy, antiplatelet drug and anticoagulant), mechanical ventilation and dialysis. ASCVD, atherosclerosis cardiovascular diseases. COPD, chronic obstructive pulmonary disease.

**eFigure 2. Probability of all cause and cause-specific mortality based on LDL-C, HDL-C, total cholesterol and triglyceride levels in individuals without lipid-lowering therapy**

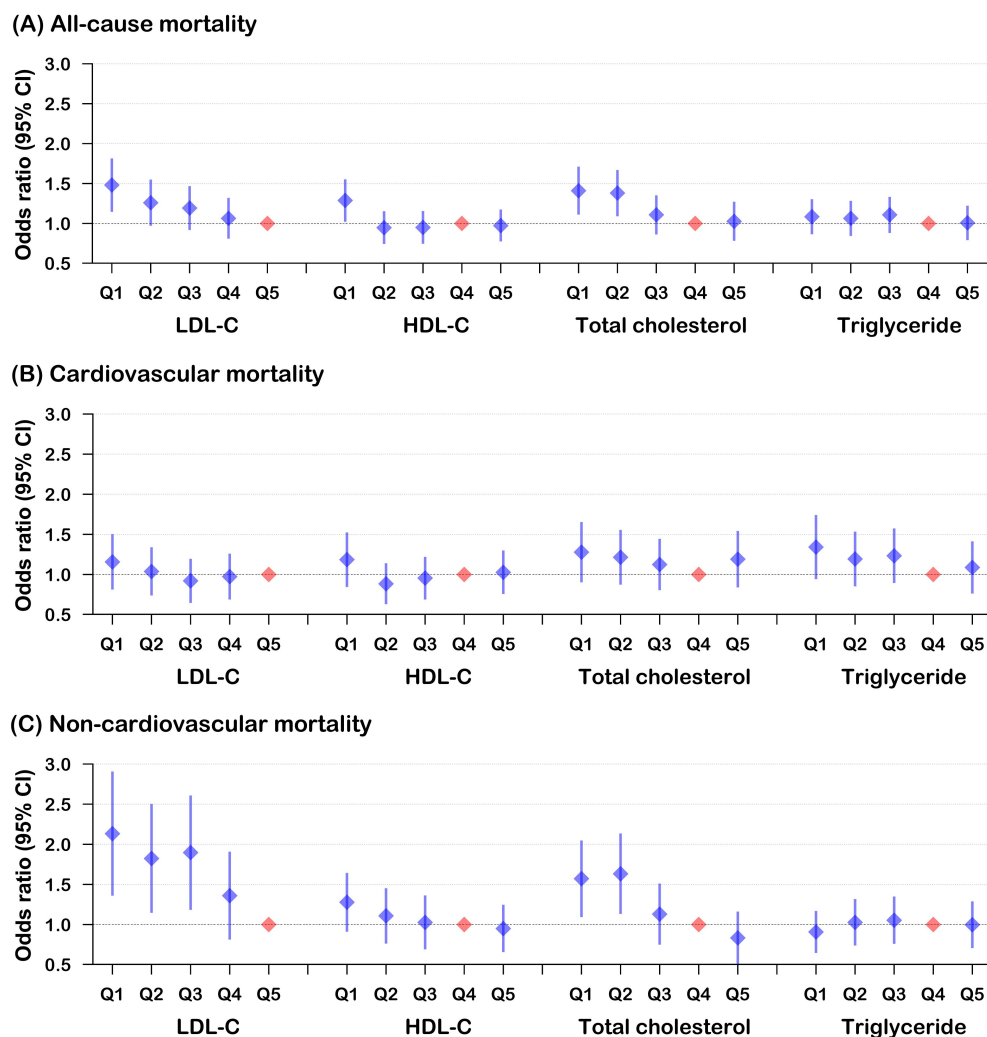

All-cause mortality (A), cardiovascular mortality (B) and non-cardiovascular mortality (C) adjusted by age, sex, ethnicity, body mass index, heart rate, mean blood pressure, disease severity score (APACHE score and Glasgow coma score), lab measurements (LDL-C, HDL-C, total cholesterol, triglyceride, white blood cell, hemoglobin, platelet and albumin), primary disease of admission (circulatory disease, respiratory disease, digestive disease, neurological disease, genitourinary disease and endocrine disease), pre-admission comorbidities (ASCVD, diabetes, hypertension, heart failure, chronic obstructive pulmonary disease and renal dysfunction), medication (lipid-lowering therapy, antiplatelet drug and anticoagulant), mechanical ventilation and dialysis. ASCVD, atherosclerosis cardiovascular diseases. COPD, chronic obstructive pulmonary disease.

**eFigure 3. Multivariable adjusted all-cause mortality risk for total cholesterol levels stratified by covariates**

Forest Plot of odds ratio for all-cause mortality stratified by age, sex, ethnicity, lipid-lowering therapy, ASCVD, LDL-C and HDL-C levels, with the first quintile ( $\leq 110$  mg/dL) compared to the fourth quintile of TC levels (159-188 mg/dL). The model was adjusted by age, sex, ethnicity, body mass index, heart rate, mean blood pressure, disease severity score (APACHE score and Glasgow coma score), lab measurements (LDL-C, HDL-C, total cholesterol, triglyceride, white blood cell, hemoglobin, platelet and albumin), primary disease of admission (circulatory disease, respiratory disease, digestive disease, neurological disease, genitourinary disease and endocrine disease), pre-admission comorbidities (ASCVD, diabetes, hypertension, heart failure, chronic obstructive pulmonary disease and renal dysfunction), medication (lipid-lowering therapy, antiplatelet drug and anticoagulant), mechanical ventilation and dialysis. ASCVD, atherosclerosis cardiovascular diseases. COPD, chronic obstructive pulmonary disease.

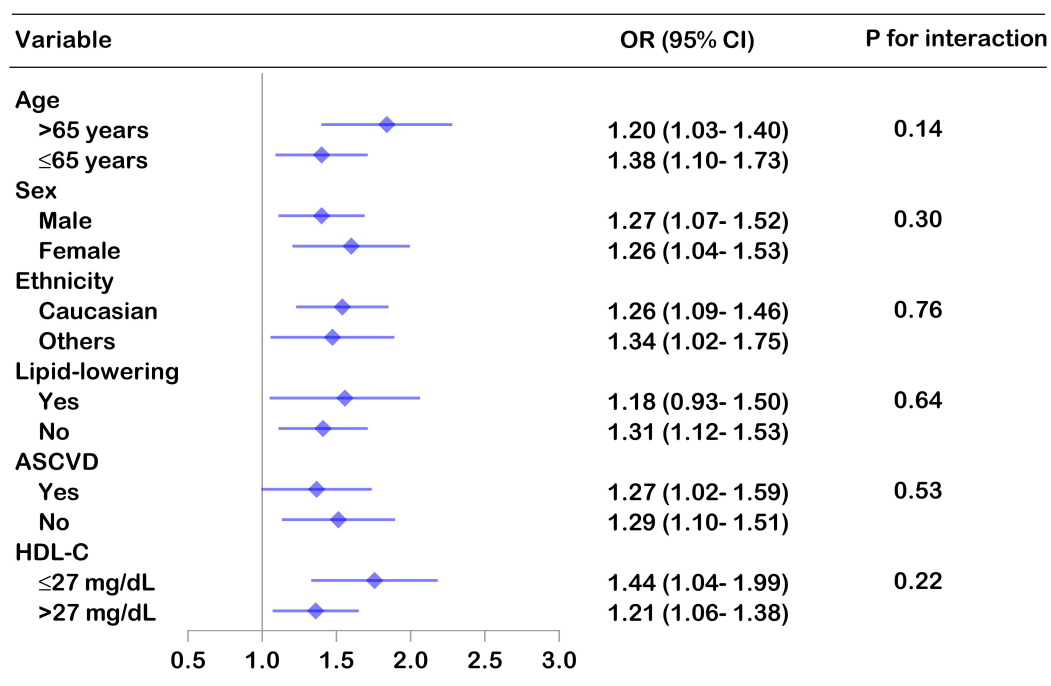

**eFigure 4. Probability of all cause mortality based on LDL-C, HDL-C, total cholesterol and triglyceride levels by excluding death within the first 24 hours of ICU entry**

Sensitivity analysis by excluding death within the first 24 hours of ICU entry (n=27097). All-cause mortality adjusted by age, sex, ethnicity, body mass index, heart rate, mean blood pressure, disease severity score (APACHE score and Glasgow coma score), lab measurements (LDL-C, HDL-C, total cholesterol, triglyceride, white blood cell, hemoglobin, platelet and albumin), primary disease of admission (circulatory disease, respiratory disease, digestive disease, neurological disease, genitourinary disease and endocrine disease), pre-admission comorbidities (ASCVD, diabetes, hypertension, heart failure, chronic obstructive pulmonary disease and renal dysfunction), medication (lipid-lowering therapy, antiplatelet drug and anticoagulant), mechanical ventilation and dialysis. ASCVD, atherosclerosis cardiovascular diseases. COPD, chronic obstructive pulmonary disease.

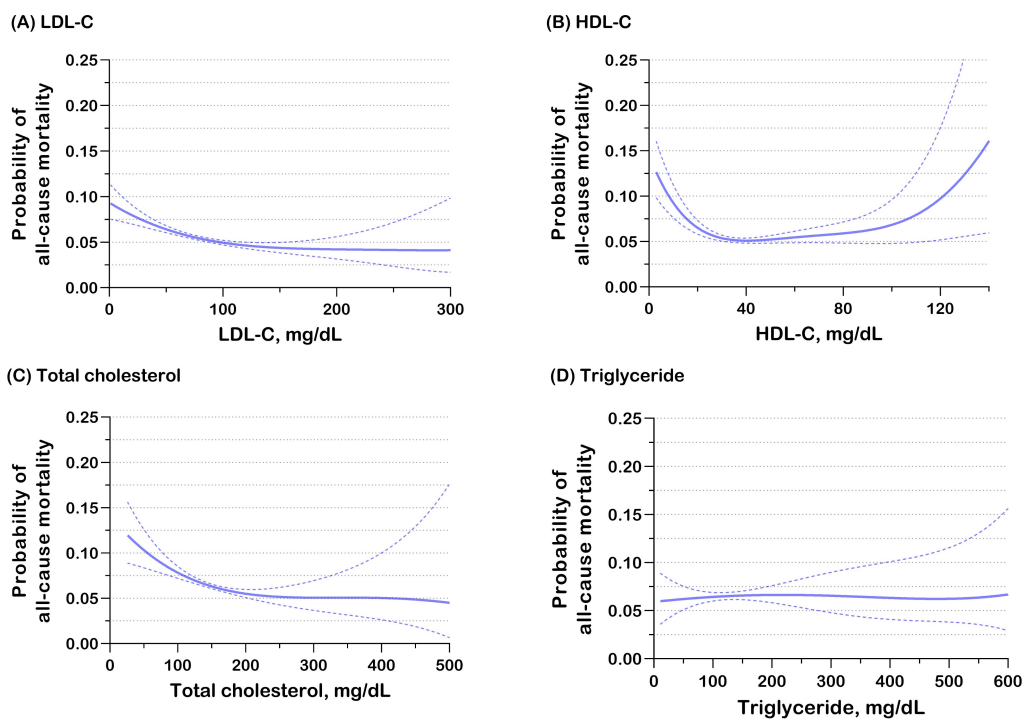

**eFigure 5. Probability of all cause mortality based on LDL-C, HDL-C, total cholesterol and triglyceride levels with complete-case analyse**

Sensitivity analysis by excluding cases with missing data (n=21223). All-cause mortality adjusted by age, sex, ethnicity, body mass index, heart rate, mean blood pressure, disease severity score (APACHE score and Glasgow coma score), lab measurements (LDL-C, HDL-C, total cholesterol, triglyceride, white blood cell, hemoglobin, platelet and albumin), primary disease of admission (circulatory disease, respiratory disease, digestive disease, neurological disease, genitourinary disease and endocrine disease), pre-admission comorbidities (ASCVD, diabetes, hypertension, heart failure, chronic obstructive pulmonary disease and renal dysfunction), medication (lipid-lowering therapy, antiplatelet drug and anticoagulant), mechanical ventilation and dialysis. ASCVD, atherosclerosis cardiovascular diseases. COPD, chronic obstructive pulmonary disease.

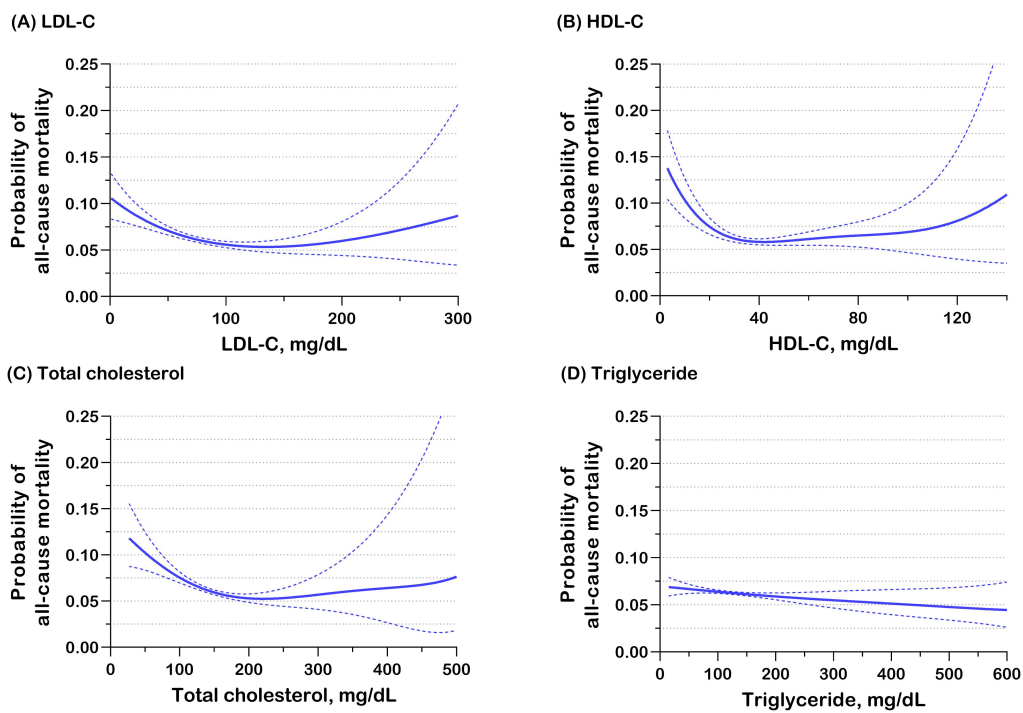



**eFigure 6. Probability of all cause mortality based on LDL-C, HDL-C, total cholesterol and triglyceride levels by using the first measurement of ICU admission**

Sensitivity analysis by using the first measurement of lipid levels after ICU admission instead of the first measurement of hospital admission (n=20388). All-cause mortality adjusted by age, sex, ethnicity, body mass index, heart rate, mean blood pressure, disease severity score (APACHE score and Glasgow coma score), lab measurements (LDL-C, HDL-C, total cholesterol, triglyceride, white blood cell, hemoglobin, platelet and albumin), primary disease of admission (circulatory disease, respiratory disease, digestive disease, neurological disease, genitourinary disease and endocrine disease), pre-admission comorbidities (ASCVD, diabetes, hypertension, heart failure, chronic obstructive pulmonary disease and renal dysfunction), medication (lipid-lowering therapy, antiplatelet drug and anticoagulant), mechanical ventilation and dialysis. ASCVD, atherosclerosis cardiovascular diseases. COPD, chronic obstructive pulmonary disease.

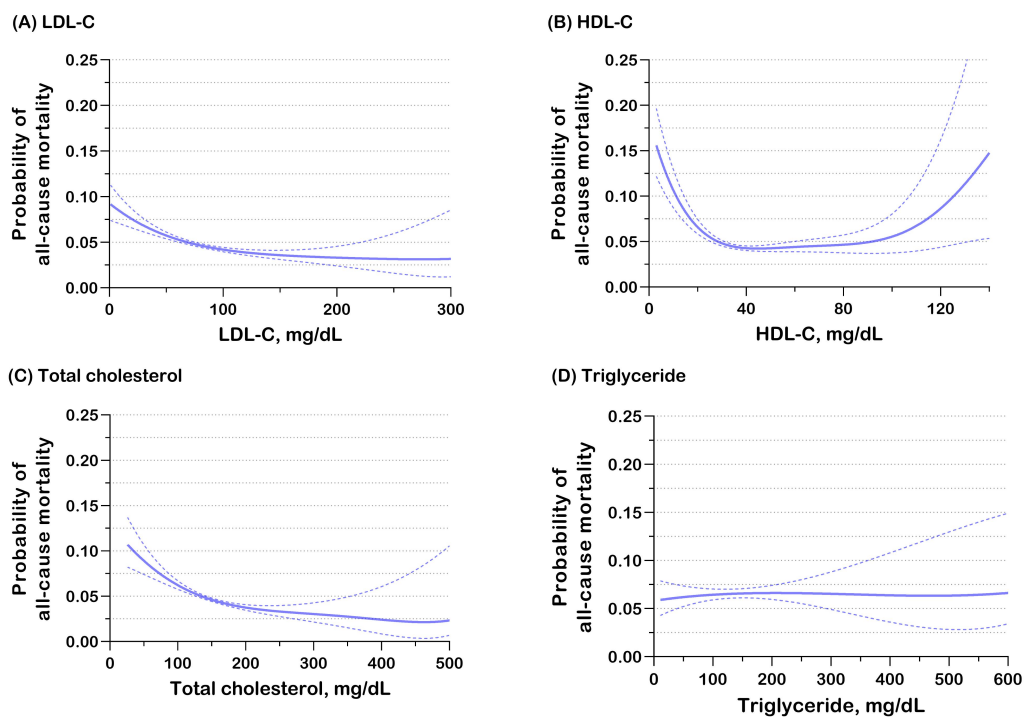

**eFigure 7. Kaplan-Meier curve for cumulative incidence with all cause mortality by quintiles of lipid levels**

**(A)**

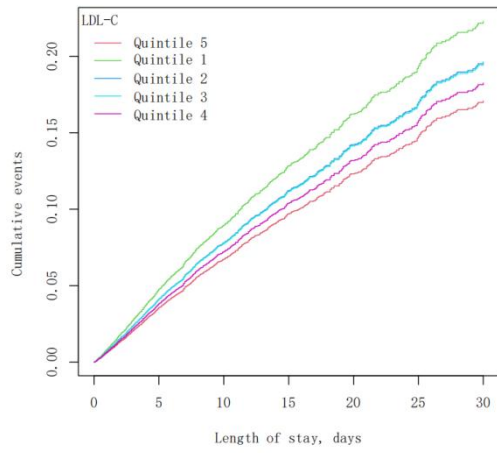

**(B)**

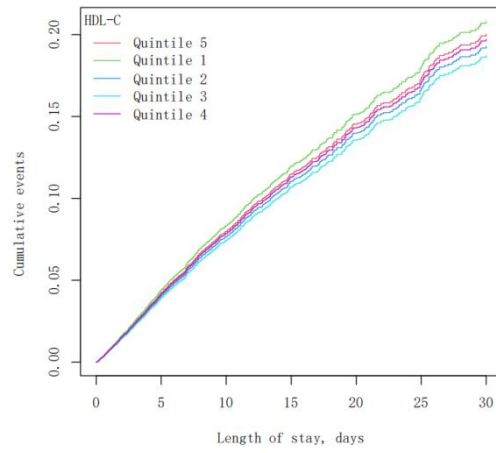

**(C)**

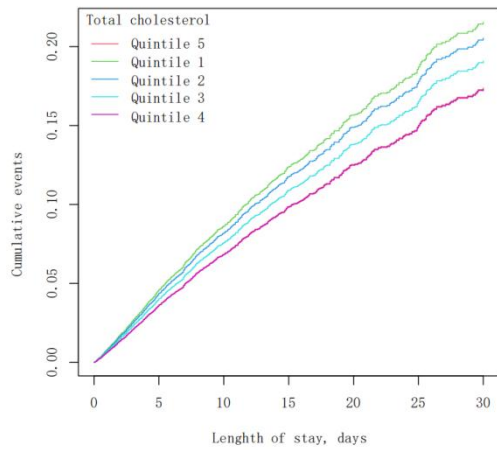

**(D)**

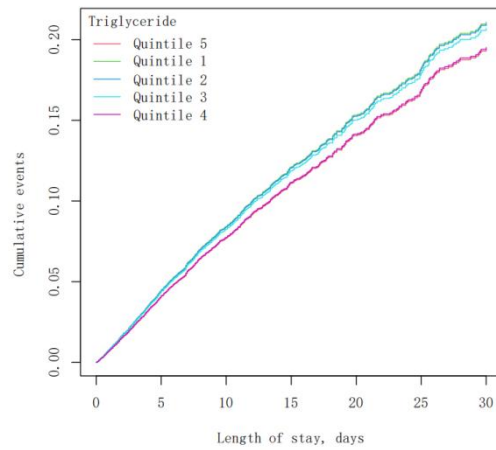

**eFigure 8. Kaplan–Meier curve for cumulative incidence with all cause mortality by LDL-C level combined with HDL-C level**

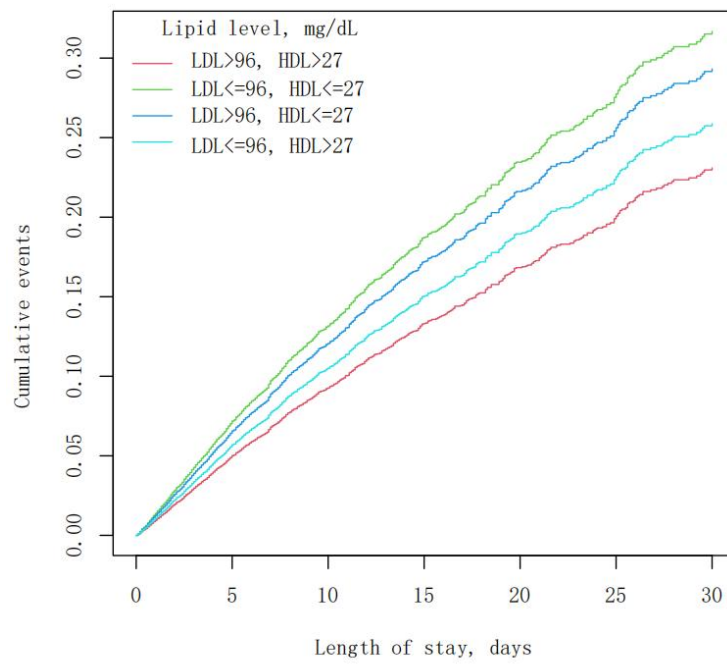

Supplement: 41598_2023_32209_MOESM1_ESM.pdf [file 41598_2023_32209_MOESM1_ESM.pdf]
